# Supplementary material for: Catalytic methanolysis of hydrazine borane: a new and efficient hydrogen generation system under mild conditions
Source: Royal Society of Chemistry journal article supplement (doi:10.1039/c2dt11867j), 2012-01-01
Supplement: c2dt11867j.pdf [file c2dt11867j.pdf]

# **Catalytic methanolysis of hydrazine borane: a new and efficient hydrogen generation system under mild conditions**

## **(Electronic Supplementary Information)**

**Senem Karahan,<sup>\* a,b</sup> Mehmet Zahmakıran<sup>c</sup> and Saim Özkar<sup>a</sup>**

<sup>a</sup> *Department of Chemistry, Middle East Technical University, 06531, Ankara, Turkey*

<sup>b</sup> *On the leave absence from Department of Chemistry, Dokuz Eylül University, 35160, İzmir, Turkey*

<sup>c</sup> *Department of Chemistry, Yüzüncü Yıl University, 65080, Van, Turkey*

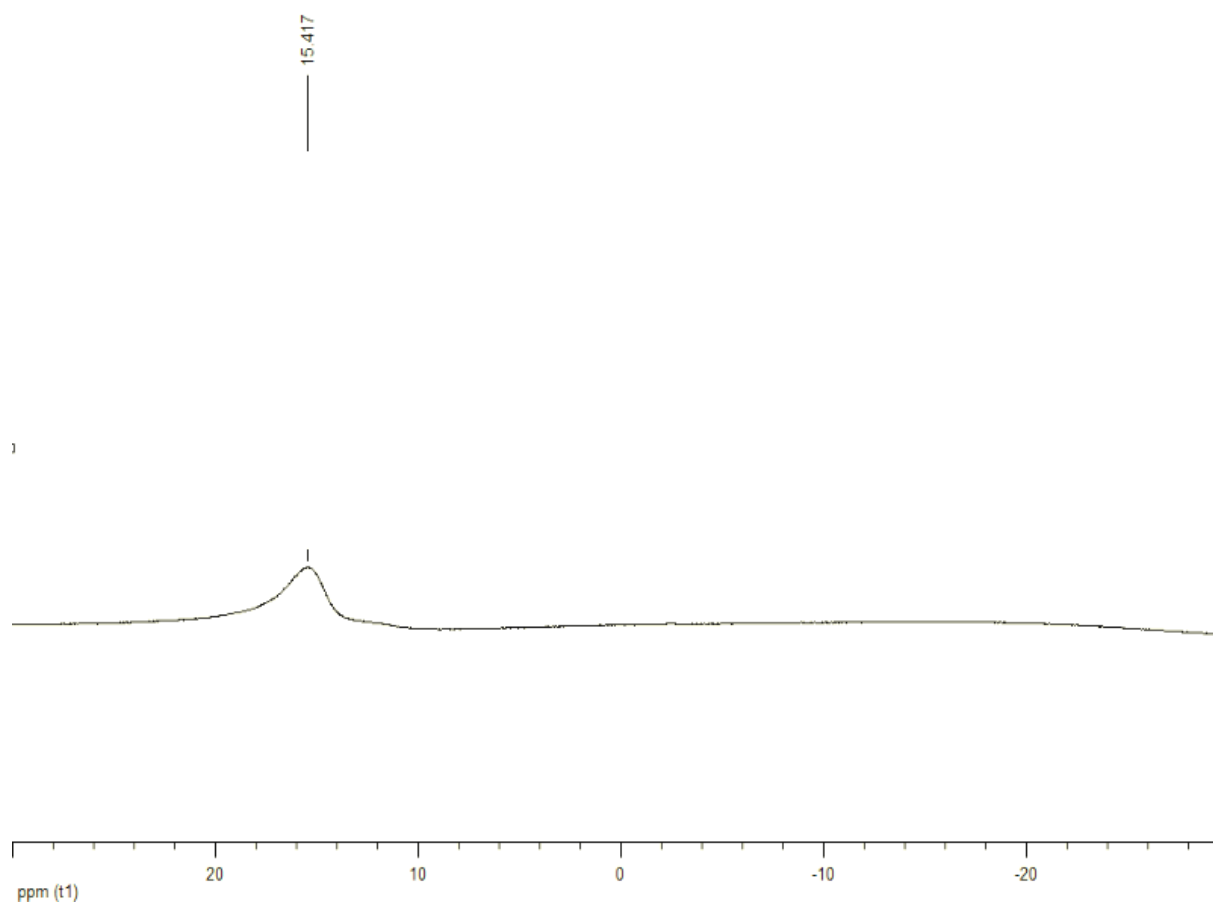

**Fig. ESI-1**  $^{11}\text{B}$  NMR spectrum of the reaction solution taken at the end of the hydrogen generation from hydrazine borane (400 mM) in a solution that contains 5 mL water and 5 mL methanol starting with  $\text{NiCl}_2$  (5.0 mM) precatalyst at  $25.0 \pm 0.1$  °C.

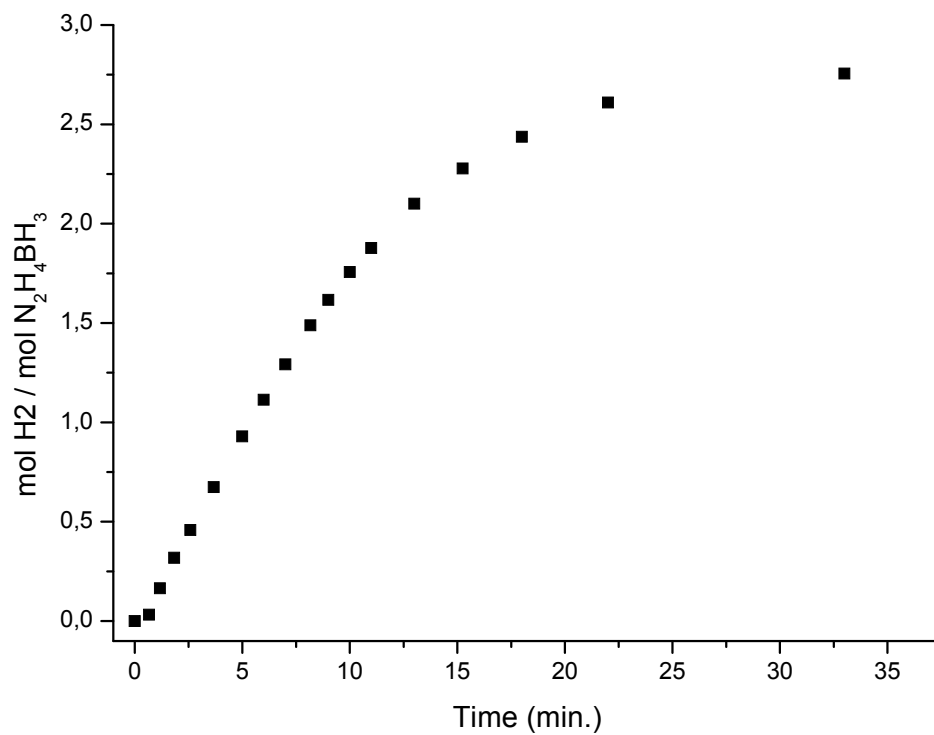

**Fig. ESI-2** Volume of hydrogen (mL) versus time (min.) graph for the hydrogen generation from hydrazine borane (400 mM) in a solution that contains 5 mL water and 5 mL methanol starting with NiCl<sub>2</sub> (5.0 mM) precatalyst at 25.0 ± 0.1 °C.

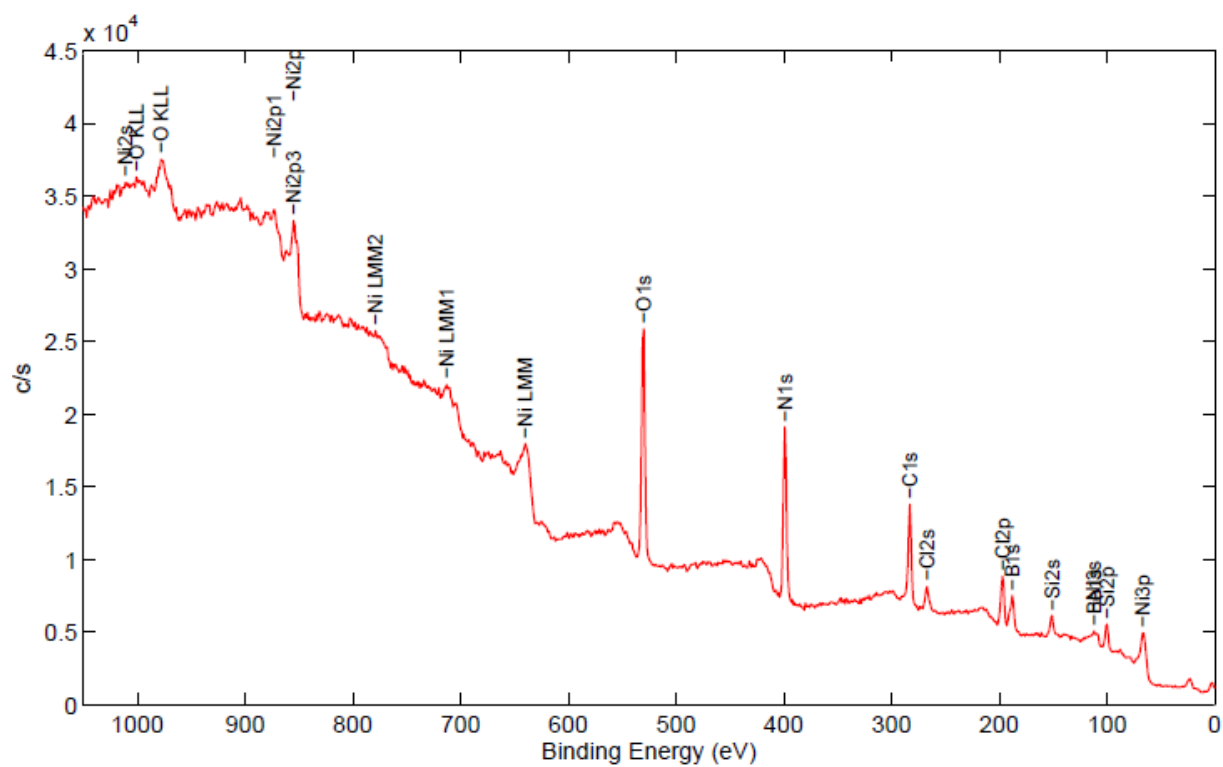

**Fig. ESI-3** XPS spectrum of the isolated solid at the end of the methanolysis of hydrazine borane (400 mM) starting with 4.0 mM NiCl<sub>2</sub> in 10 mL methanol at  $25.0 \pm 0.1$  °C.

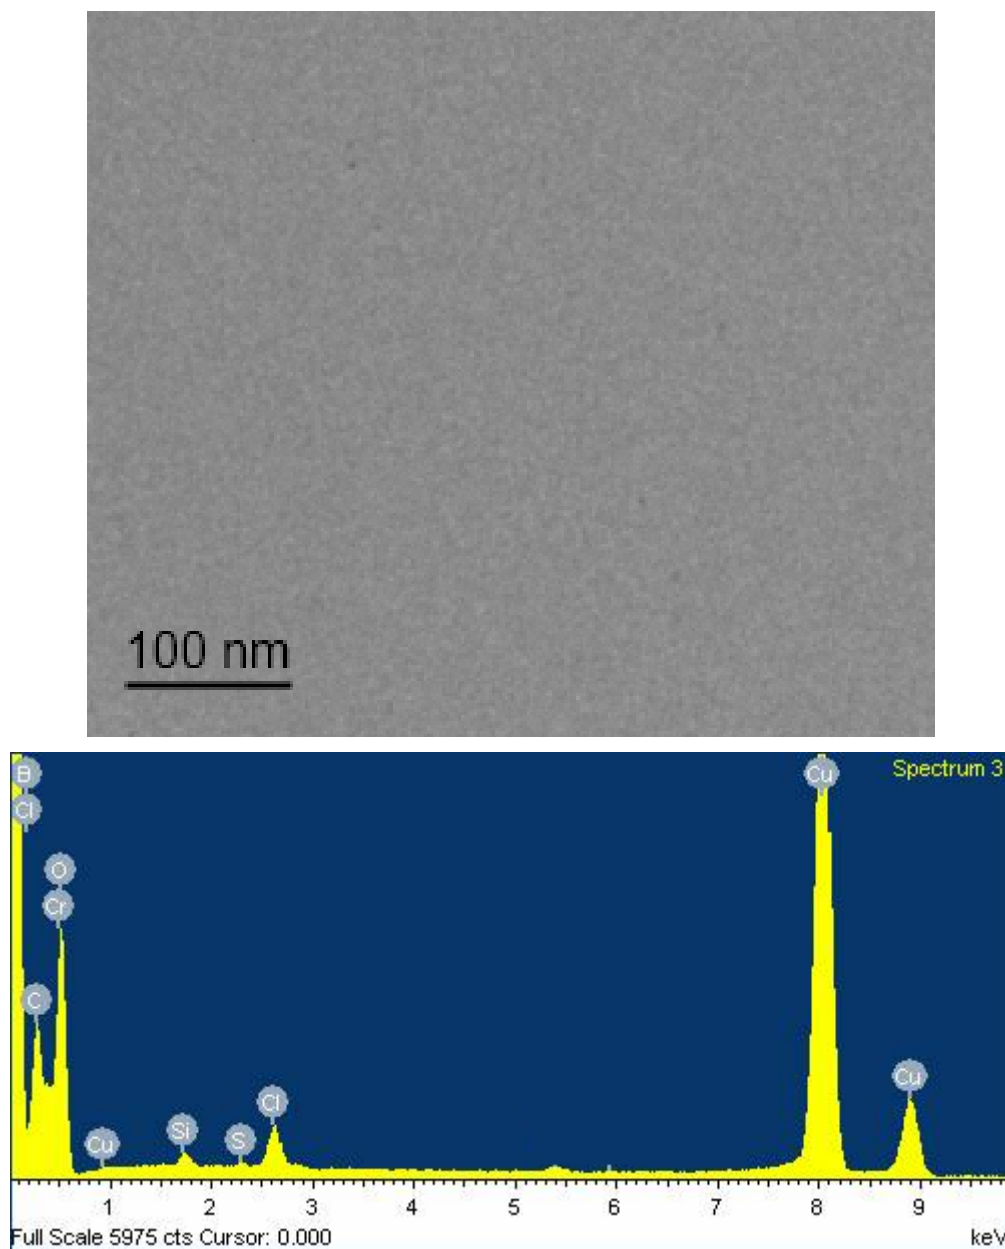

**Fig. ESI-4** TEM image and corresponding TEM-EDX spectrum of the reaction solution harvested at the end of the methanolysis of hydrazine borane (400 mM) starting with 4.0 mM NiCl<sub>2</sub> in 10 mL methanol at 25.0 ± 0.1 °C (EDX spectrum also contains some impurities such as Si and Cu presumably coming from TEM grid).

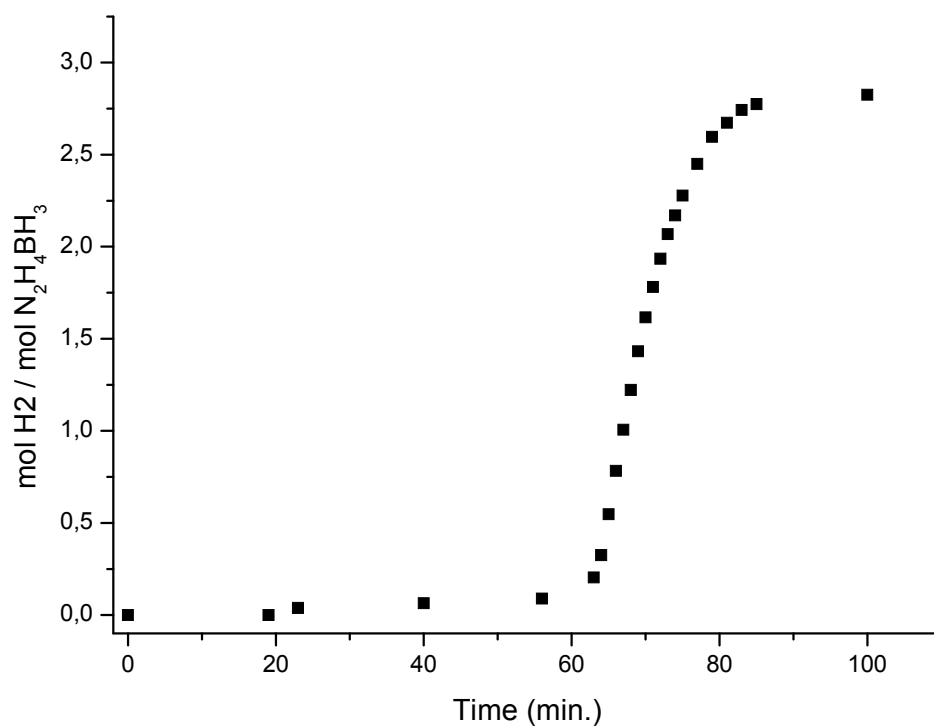

**Fig. ESI-5** Volume of hydrogen (mL) versus time (min.) graph for the methanolysis of hydrazine borane (400 mM) starting with Ni(II)-2-ethylhexanoate (11.0 mM) precatalyst in 10 mL methanol at  $25.0 \pm 0.1$  °C.
